# Supplementary material
Source: Springer Nature journal article supplement (https://www.springermedizin.de/resource/supplementary/12865_2010_378_MOESM7_ESM.pdf/9427870)

A

CD72

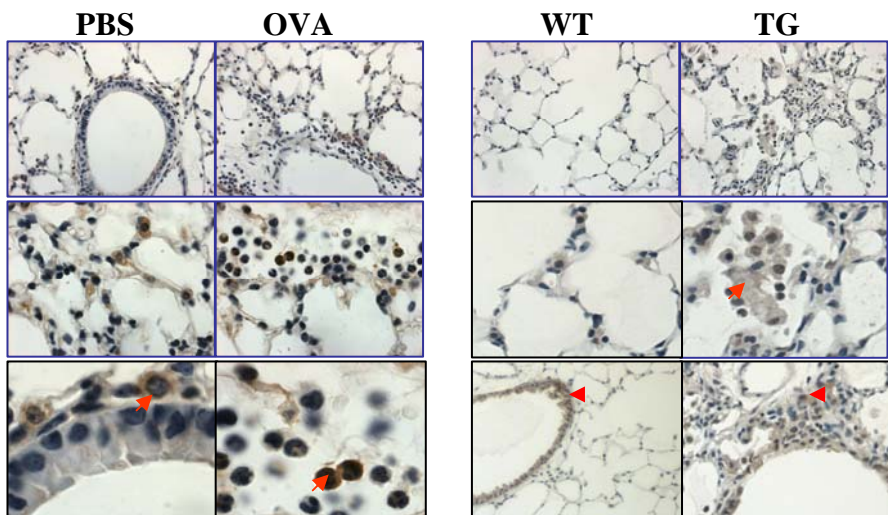

B

PBS

OVA

MHCII+ cells

PBS

OVA

CD4+ T cells

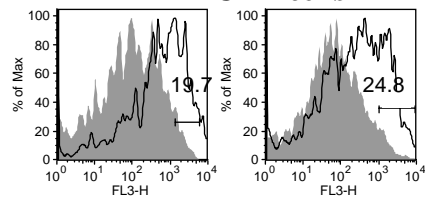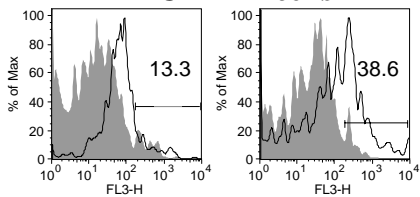

cDC

CD8+ T cells

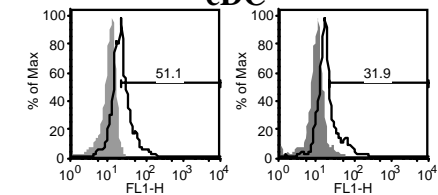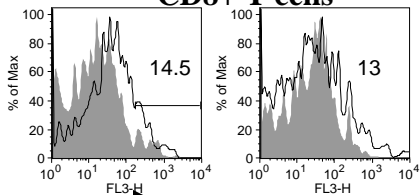

pDC

CD72

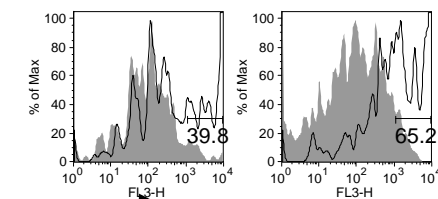

CD72

Supplement: MOESM7 [file 9427870]
